# Supplementary material
Source: PubMed Central journal article supplement (PMC4194103)
Supplement: embj0033-1713-sd2.pdf [file embj0033-1713-sd2.pdf]

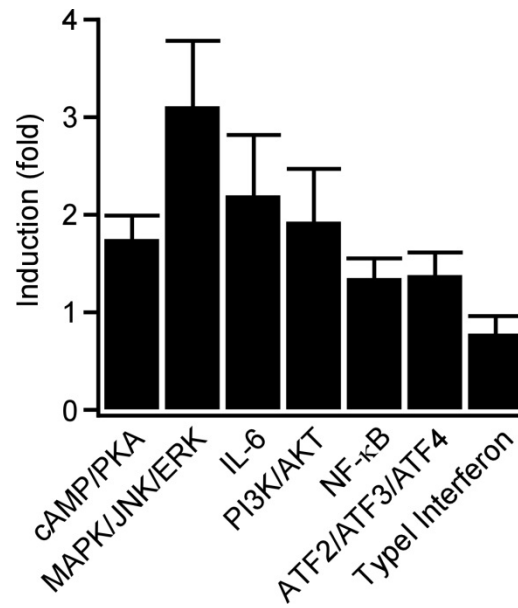

**Figure S2.** Pathway activation in HEK293 cells in response to blue light. Cells were transiently transfected with Opto-mFGFR1 and luciferase reporter vectors. 24 h after transfection, cells were stimulated with blue light for 8 h followed by detection of luciferase activity. Activation is expressed as induction (RLU of illuminated cells divided by RLU of cells kept in the dark). Control cells did not respond to blue light (data not shown). Light intensity was  $\sim 2.5 \mu\text{W}/\text{mm}^2$ . Mean values  $\pm$  SEM for three independent experiments each performed in triplicates are shown.
