# Supplementary material
Source: PubMed Central journal article supplement (PMC4194103)
Supplement: embj0033-1713-sd3.pdf [file embj0033-1713-sd3.pdf]

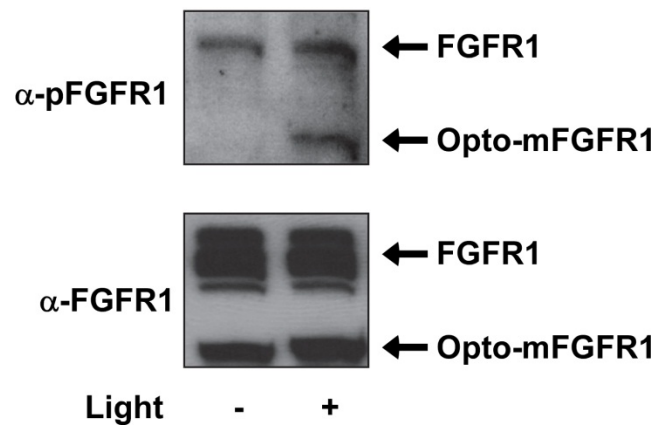

**Figure S3.** Increased phosphorylation of Opto-mFGFR1 but not endogenous FGFR1 is observed in HEK293 cells stably transfected with Opto-mFGFR1. Cells were stimulated with blue light for 5 min. Light intensity was  $\sim 2.5 \mu\text{W}/\text{mm}^2$ . Comparable levels of expression are observed for endogenous FGFR1 and Opto-mFGFR1.
