# Supplementary material
Source: PubMed Central journal article supplement (PMC4194103)
Supplement: embj0033-1713-sd4.pdf [file embj0033-1713-sd4.pdf]

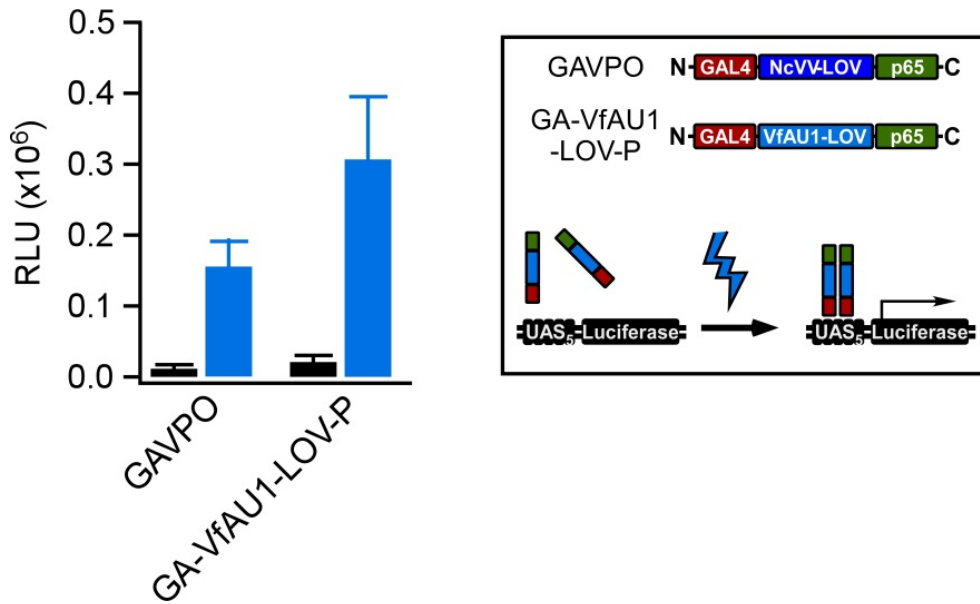

**Figure S4.** Activation of transcription in response to blue light in HEK293 cells transfected with a transcription factor that contains VfAU1-LOV (GA-VfAU1-LOV-P). This transcription factor requires dimerization for activity. Gene design and positive control (GAVPO) are described in Materials and Methods. 24 h after transient transfection, cells were stimulated with blue light for 8 h followed by detection of luciferase activity. Light intensity was  $\sim 2.5 \mu\text{W}/\text{mm}^2$ . Mean values  $\pm$  SEM for three independent experiments each performed in triplicates are shown.
