# Supplementary material
Source: PubMed Central journal article supplement (PMC4194103)
Supplement: embj0033-1713-sd5.pdf [file embj0033-1713-sd5.pdf]

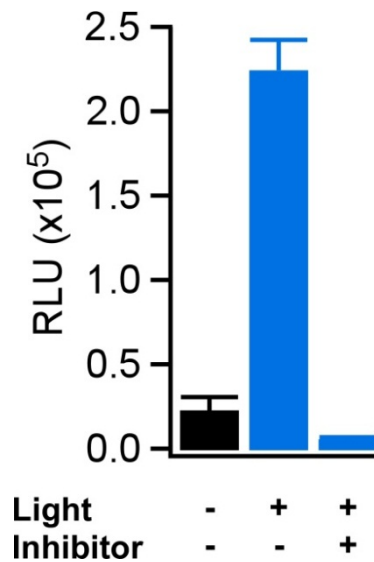

**Figure S5.** Activation of Elk1 luciferase reporter in response to blue light depends on the MAPK/ERK pathway. UO126, a selective MEK inhibitor, abolishes reporter activation in HEK293 cells transiently transfected with Opto-mFGFR1. Inhibitor was added at a concentration of 10  $\mu$ M 45 min prior to light stimulation. Cells were stimulated with blue light for 8 h followed by detection of luciferase activity. Light intensity was  $\sim$ 2.5  $\mu$ W/mm<sup>2</sup>. Mean values  $\pm$  SEM for two independent experiments each performed in triplicates are shown.
