# Supplementary material
Source: PubMed Central journal article supplement (PMC4194103)
Supplement: embj0033-1713-sd6.pdf [file embj0033-1713-sd6.pdf]

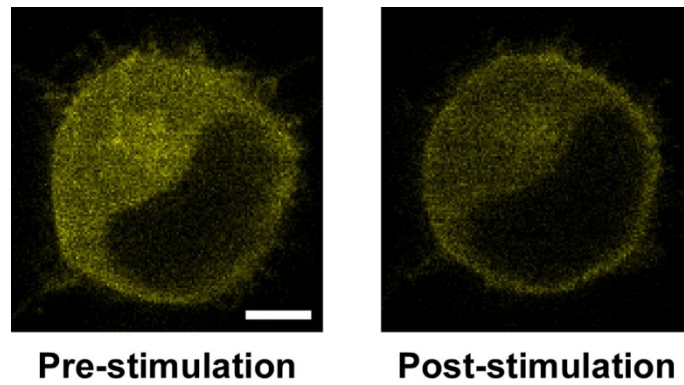

**Figure S6.** Confocal microscopy of HEK293 cells transiently transfected with Opto-mFGFR1 and PLC $\gamma$ 1-mVenus. Images were taken before and after cells were stimulated with blue light for 2 min and reveal membrane recruitment of PLC $\gamma$ 1-mVenus. Light intensity was  $\sim 2.5 \mu\text{W}/\text{mm}^2$ . Scale bar: 25  $\mu\text{m}$ .
