# Supplementary material
Source: PubMed Central journal article supplement (PMC4194103)
Supplement: embj0033-1713-sd8.pdf [file embj0033-1713-sd8.pdf]

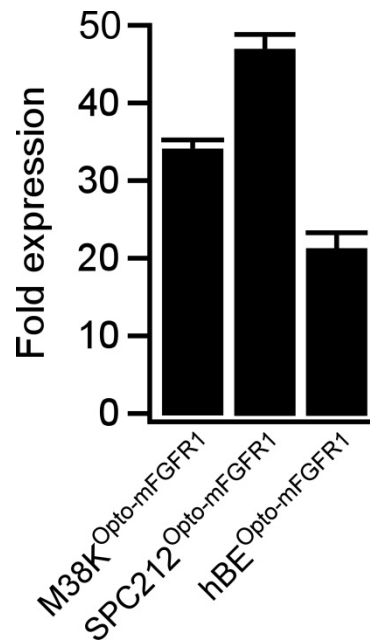

**Figure S8.** Expression levels of Opto-mFGFR1 and FGFR1 in M38K<sup>Opto-mFGFR1</sup>, SPC212<sup>Opto-mFGFR1</sup> and hBE<sup>Opto-mFGFR1</sup> cells. Total RNA from these cells and control cells was extracted, reverse transcribed and subjected to qPCR. Bars represent fold mRNA levels of Opto-mFGFR1 compared to endogenous FGFR1. Mean values  $\pm$  SEM for three independent experiments each performed in duplicates are shown.
