# Supplementary material
Source: PubMed Central journal article supplement (PMC4194103)
Supplement: embj0033-1713-sd10.pdf [file embj0033-1713-sd10.pdf]

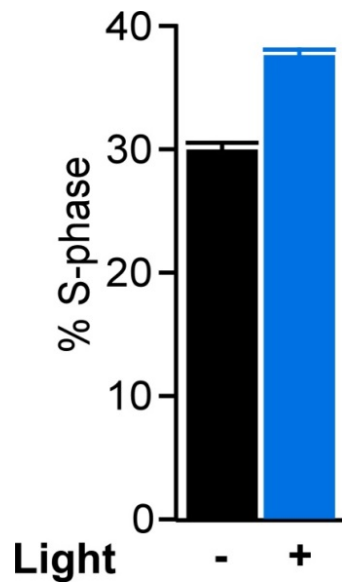

**Figure S10.** Percentage of M38K<sup>Opto-mFGFR1</sup> cells in S-phase in response to blue light. Cells were stimulated with blue light for 1 h. Cell cycle was analysed after 24 h by flow cytometry. Light intensity was  $\sim 2.5 \mu\text{W}/\text{mm}^2$ . Mean values  $\pm$  SEM for two independent experiments each performed in triplicates are shown.
