# Supplementary material
Source: PubMed Central journal article supplement (PMC4194103)
Supplement: embj0033-1713-sd11.pdf [file embj0033-1713-sd11.pdf]

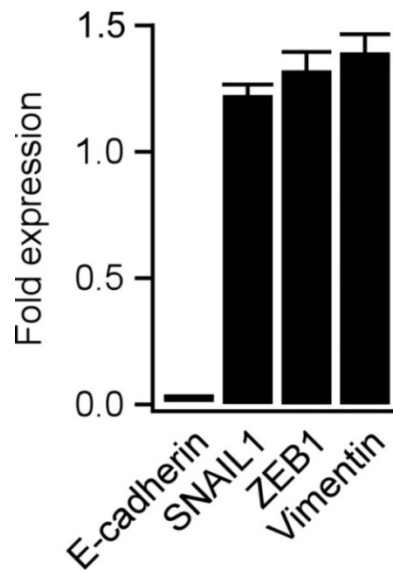

**Figure S11.** Expression of the epithelial marker E-cadherin, the mesenchymal marker vimentin and the EMT-associated transcription factors SNAIL1 and ZEB1 in M38K<sup>Opto-mFGFR1</sup> cells in response to blue light. Cells were stimulated with blue light for 5 min every 15 min for 48 h followed by gene expression analysis by qPCR. Light intensity was  $\sim 2.5 \mu\text{W}/\text{mm}^2$ . Mean values  $\pm$  SEM for three independent experiments each performed in duplicates are shown.
