# Supplementary material
Source: PubMed Central journal article supplement (PMC4194103)
Supplement: embj0033-1713-sd12.pdf [file embj0033-1713-sd12.pdf]

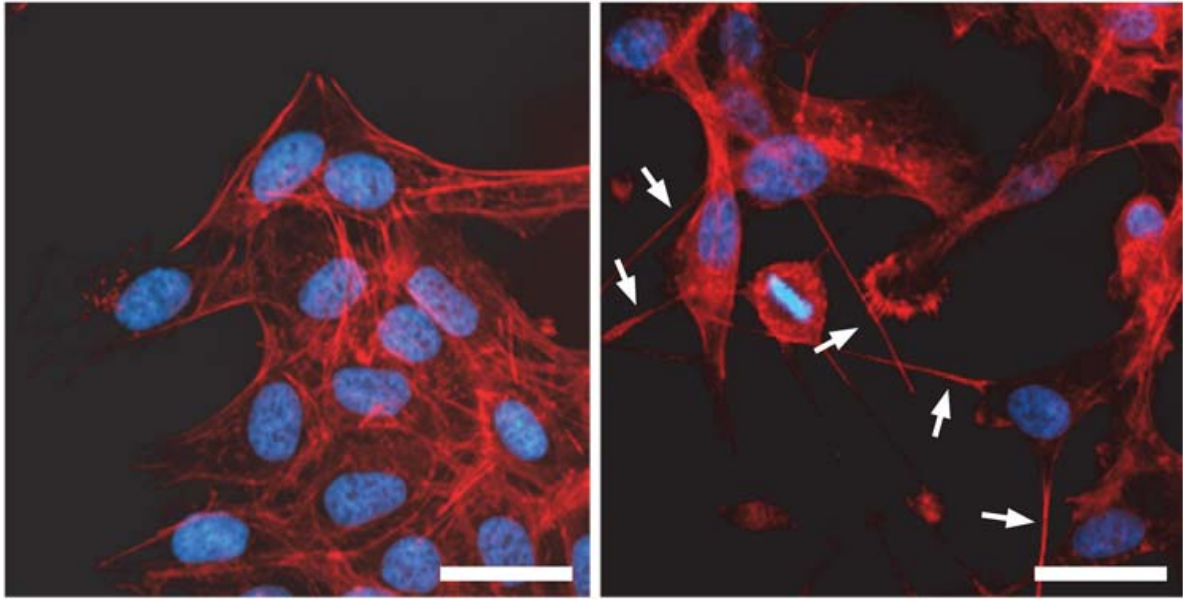

**Figure S12.** Reduction of cortical actin and the emergence of long actin-rich filopodia (arrows) in M38K<sup>Opto-mFGFR1</sup> cells in response to blue light. (left) Unstimulated M38K<sup>Opto-mFGFR1</sup> cells. (right) M38K<sup>Opto-mFGFR1</sup> cells stimulated with blue light. Red: TRITC-phalloidin staining. Blue: DAPI staining. Cells were stimulated with blue light for 5 min every 15 min for 48 h. Light intensity was  $\sim 2.5 \mu\text{W}/\text{mm}^2$ . **Scale bar: 20  $\mu\text{m}$ .**
