# Supplementary material
Source: PubMed Central journal article supplement (PMC4194103)
Supplement: embj0033-1713-sd13.pdf [file embj0033-1713-sd13.pdf]

**Table S1.** Photoadduct lifetimes of LOV domains.

| <b>LOV domain</b>                                                                                                                                                                                                                                                                                                                                                                                                                                                                                        | <b>Estimated excited state lifetime (s)<sup>3</sup></b> | <b>Reference</b>                                            |
|----------------------------------------------------------------------------------------------------------------------------------------------------------------------------------------------------------------------------------------------------------------------------------------------------------------------------------------------------------------------------------------------------------------------------------------------------------------------------------------------------------|---------------------------------------------------------|-------------------------------------------------------------|
| AtPH1-LOV2                                                                                                                                                                                                                                                                                                                                                                                                                                                                                               | ~40                                                     | (Kasahara <i>et al</i> , 2002; Katsura <i>et al</i> , 2009) |
| AtPH2-LOV2                                                                                                                                                                                                                                                                                                                                                                                                                                                                                               | ~7                                                      | (Kasahara <i>et al</i> , 2002; Katsura <i>et al</i> , 2009) |
| CrPH-LOV1                                                                                                                                                                                                                                                                                                                                                                                                                                                                                                | <sup>1</sup>                                            | (Kutta <i>et al</i> , 2008)                                 |
| NcVV-LOV                                                                                                                                                                                                                                                                                                                                                                                                                                                                                                 | >10'000                                                 | (Schwerdtfeger & Linden, 2003)                              |
| RsLP-LOV                                                                                                                                                                                                                                                                                                                                                                                                                                                                                                 | ~2350                                                   | (Conrad <i>et al</i> , 2013)                                |
| VfAU1-LOV                                                                                                                                                                                                                                                                                                                                                                                                                                                                                                | WT: 625 (220 at 37°C)<br>I28V (I472V): 50 (30 at 37°C)  | This work                                                   |
| VfAU1-LOV <sup>2</sup>                                                                                                                                                                                                                                                                                                                                                                                                                                                                                   | ~300                                                    | (Takahashi <i>et al</i> , 2007)                             |
| VfAU1-LOV <sup>2</sup>                                                                                                                                                                                                                                                                                                                                                                                                                                                                                   | WT: 480<br>I28V (I472V): 60                             | (Mitra <i>et al</i> , 2012)                                 |
| <sup>1</sup> A triple exponential decay with lifetimes ranging from 20 to 800 s was observed.<br><sup>2</sup> LOV domains included C- and N-terminal extensions compared to VfAU1-LOV of this work and the work of Toyooka <i>et al.</i> (Toyooka <i>et al</i> , 2011)<br><sup>3</sup> Where necessary, published half lifes ( $t_{1/2}$ ) were converted to lifetimes assuming a first order reaction ( $\tau = t_{1/2}/\ln(2)$ ).<br>Experiments were performed at 20°C or RT unless stated otherwise. |                                                         |                                                             |

## References

- Conrad KS, Bilwes AM, Crane BR (2013) Light-induced subunit dissociation by a light-oxygen-voltage domain photoreceptor from *Rhodobacter sphaeroides*. *Biochemistry* **52**: 378-391
- Kasahara M, Swartz TE, Olney MA, Onodera A, Mochizuki N, Fukuzawa H, Asamizu E, Tabata S, Kanegae H, Takano M, Christie JM, Nagatani A, Briggs WR (2002) Photochemical properties of the flavin mononucleotide-binding domains of the phototropins from *Arabidopsis*, rice, and *Chlamydomonas reinhardtii*. *Plant Physiology* **129**: 762-773
- Katsura H, Zikihara K, Okajima K, Yoshihara S, Tokutomi S (2009) Oligomeric structure of LOV domains in *Arabidopsis* phototropin. *FEBS Lett* **583**: 526-530
- Kutta RJ, Hofinger ES, Preuss H, Bernhardt G, Dick B (2008) Blue-light induced interaction of LOV domains from *Chlamydomonas reinhardtii*. *Chembiochem* **9**: 1931-1938
- Mitra D, Yang X, Moffat K (2012) Crystal structures of Aureochrome1 LOV suggest new design strategies for optogenetics. *Structure* **20**: 698-706
- Schwerdtfeger C, Linden H (2003) VIVID is a flavoprotein and serves as a fungal blue light photoreceptor for photoadaptation. *EMBO J* **22**: 4846-4855
- Takahashi F, Yamagata D, Ishikawa M, Fukamatsu Y, Ogura Y, Kasahara M, Kiyosue T, Kikuyama M, Wada M, Kataoka H (2007) AUREOCHROME, a photoreceptor required for photomorphogenesis in stramenopiles. *Proc Natl Acad Sci U S A* **104**: 19625-19630
- Toyooka T, Hisatomi O, Takahashi F, Kataoka H, Terazima M (2011) Photoreactions of aureochrome-1. *Biophys J* **100**: 2801-2809
