# Supplementary material
Source: PubMed Central journal article supplement (PMC4194103)
Supplement: embj0033-1713-sd15.pdf [file embj0033-1713-sd15.pdf]

**Table S3.** Oligonucleotides utilized in gene construction. Restriction sites are underlined.

| Name                            | Sequence                                               |
|---------------------------------|--------------------------------------------------------|
| 1: imFGFR1_inverse_R            | TGAG <u>ACCGGT</u> CTCGACGCGCCGTTTGAG                  |
| 2: imFGFR1_inverse1_F           | CAAG <u>ACCGGT</u> GGATCCGGAGTCGACTATC                 |
| 3: imFGFR1_inverse2_F           | CAAG <u>ACCGGT</u> AAACTGGAAGTCGAGGGAGTGC              |
| 4: FKBP_AgeI_F                  | GATC <u>ACCGGT</u> AAACTGGAAGTCGAGGGAGTGC              |
| 5: FKBP_XmaI_R                  | GATC <u>CCCGGG</u> ACCGCCAGATTCCAGTTTTAGAAG            |
| 6: AtPH1-LOV2_AgeI_F            | GATC <u>ACCGGT</u> GAAAGCGTTGATGATAAGGTCAGACAG<br>AAGG |
| 7: AtPH1-LOV2_XmaI_R            | GATC <u>CCCGGG</u> CCGCACGGGCTCAACGTGCT                |
| 8: AtPH2-LOV2_AgeI_F            | GATC <u>ACCGGT</u> GATTCTTGGGATCTGAGTGATAGGGAAA<br>GG  |
| 9: AtPH2-LOV2_XmaI_R            | GATC <u>CCCGGG</u> GCTGGAGTGGCTCGACATGATCTGAC          |
| 10: CrPH1-LOV1_AgeI_F           | GATC <u>ACCGGT</u> GCAGGACTCAGACATACATTTGTGGTG<br>G    |
| 11: CrPH1-LOV1_XmaI_R           | GATC <u>CCCGGG</u> GGCCAGGGCTTTCCTTCAGTC               |
| 12: NcVV-LOV_XmaI_F             | GATC <u>CCCGGG</u> CACACTCTCTACGCCCCAGGCG              |
| 13: NcVV-LOV_XmaI_R             | GATC <u>CCCGGG</u> TTCGGTTTCGCACTGAAAACCCATGCT         |
| 14: VfAU1-LOV_AgeI_F            | GATC <u>ACCGGT</u> CCTGACTACAGTCTCGTGAAGG              |
| 15: VfAU1-LOV_XmaI_R            | GATC <u>CCCGGG</u> CCTTCTGCGCAGCATGTTACTGG             |
| 16: Opto-mFGFR1<br>_YY271/2FF_F | GAGACATTCATCATATCGACTTCTTCAAGAAAACCACCA<br>ACGGCC      |
| 17: Opto-mFGFR1<br>_YY271/2FF_R | GGCCGTTGGTGGTTTTCTTGAAGAAGTCGATATGATGA<br>ATGTCTC      |
| 18: Opto-mFGFR1<br>_R195E_F     | TACAGGCCCGGGAGCCTCCTGGGCTGGAGTACTGCTA<br>TAA           |
| 19: Opto-mFGFR1<br>_R195E_R     | TTATAGCAGTACTCCAGCCCAGGAGGCTCCCGGGCCT<br>GTA           |
| 20: Opto-mFGFR1<br>_I472V_F     | CTCCCAGACAACCCTGTCGTCTACGCCAGTAG                       |
| 21: Opto-mFGFR1<br>_I472V_R     | CTACTGGCGTAGACGACAGGGTTGTCTGGGAG                       |
| 22: Opto-mFGFR1<br>_Y81F_F      | CTGGCTGGAGTCTCCGAATTTGAGCTCCCT                         |
| 23: Opto-mFGFR1                 | AGGGAGCTCAAATTCGGAGACTCCAGCCAG                         |

|                               |                                                           |
|-------------------------------|-----------------------------------------------------------|
| _Y81F_R                       |                                                           |
| 24: Opto-mFGFR1<br>_Y201F_F   | CTCCTGGGCTGGAGTTCTGCTATAACCCCAG                           |
| 25: Opto-mFGFR1<br>_Y201F_R   | CTGGGGTTATAGCAGA ACTCCAGCCCAGGAG                          |
| 26: Opto-mFGFR1<br>_Y203F_F   | TTGTGGCTGGGGTTAAAGCAGTACTCCAGCC                           |
| 27: Opto-mFGFR1<br>_Y203F_R   | GGCTGGAGTACTGCTTTAACCCCAGCCACAA                           |
| 28: Opto-mFGFR1<br>_Y348F_F   | CTGTACCAATGAGCTGTTTCATGATGATGCGGGACT                      |
| 29: Opto-mFGFR1<br>_Y348F_R   | AGTCCCGCATCATCATGAACAGCTCATTGGTACAG                       |
| 30: Opto-mFGFR1<br>_Y384F_F   | CCTTGACCTCCAACCAGGAGTTTCTGGACCTGT                         |
| 31: Opto-mFGFR1<br>_Y384F_R   | ACAGGTCCAGAACTCCTGGTTGGAGGTCAAGG                          |
| 32: Opto-mFGFR1<br>_Y447S_F   | GAGACCGGTCCTGACAGCAGTCTCGTGAAGGC                          |
| 33: Opto-mFGFR1<br>_Y447S_R   | GCCTTCACGAGACTGCTGTCAGGACCGGTCTC                          |
| 34: Opto-mFGFR1<br>_4A_ClaI_F | ATGC <u>ATCGAT</u> CGCAGCACGCGCACAGGTAACAGTGTC<br>AGCTGAC |
| 35: Opto-mFGFR1<br>_4A_ClaI_R | TGCG <u>ATCGAT</u> GCGGCCAGCTTGTGCACAGC                   |
| 36: MYR_inverse_R             | GATC <u>CACCGGT</u> GACGTCGAGGCGCTGGCTGG                  |
| 37: VfAU1-LOV_inverse_F       | GATC <u>CACCGGT</u> GGACCTGACTACAGTCTCGTGAAG              |
| 38:<br>hEGFR_ICD_AgeI_AscI_F  | GATC <u>CACCGGTGGCGCGCC</u> CGAAGGCGCCACATCGTTC           |
| 39: hEGFR_ICD_BspEI_R         | GATC <u>TCCGGAT</u> GCTCCAATAAATTCAGTCTTTG                |
| 40: hRET_ICD_AgeI_F           | GATC <u>CACCGGT</u> CACTGCTACCACAAGTTTGCC                 |
| 41: hRET_ICD_AgeI_R           | GATC <u>CACCGGT</u> GAATCTAGTAAATGCATG                    |
| 42: LNGFR_ECD_NotI_F          | GATC <u>GCGGCCG</u> CACCATGGGGGCAGGTGCCACC                |
| 43: LNGFR_ECD_AscI_R          | GATC <u>GCGGCCG</u> CCCCTCTTGAAGGCTATGTAGGCC              |
| 44: VfAU1-LOV_BglII_F         | CTTT <u>AGATCT</u> CCTGACTACAGTCTCGTGAAGG                 |

|                           |                                    |
|---------------------------|------------------------------------|
| 45: VfAU1-LOV_EcoRI_R     | CTTTGAATTCCTTTCTGCGCAGCATGTTACTG   |
| 46: FRS2_NheI_F           | TAGCGCTAGCATGGGTAGCTGTTGTAGCTGTCC  |
| 47: FRS2_NheI_R           | TAGCGCTAGCTTTCCAGGCTAACATGGGCAGATC |
| 48: PLC $\gamma$ 1_AgeI_F | TAGCACCGGTGCGGGCGCCGCGTCCC         |
| 49: PLC $\gamma$ 1_AgeI_R | TAGCACCGGTCCGAGTCCTTCTTGGGGC       |
| 50: h/mFGFR1_F            | GGTGTGCCTGTGGAGGA ACTT             |
| 51: h/mFGFR1_R            | CCAGCAGTCCCGCATCATCAT              |
| 52: GAPDH_F               | CTGGCGTCTTCACCACCAT                |
| 53: GAPDH_R               | GCCTGCTTCACCACCTTCT                |
| 54: VfAU1-LOV_BamHI_F     | GATCGGATCCCCTGACTACAGTCTCGTG       |
| 55: VfAU1-LOV_KpnI_R      | GATCGGTACCTTACTTTCTGCGCAGCATGTTAC  |
