# Supplementary material
Source: PubMed Central journal article supplement (PMC4194103)
Supplement: embj0033-1713-sd16.pdf [file embj0033-1713-sd16.pdf]

**Table S4.** DNA sequences of codon-optimized LOV domains.

| Name           | Sequence                                                                                                                                                                                                                                                                                                                                                                                                                                                                                          |
|----------------|---------------------------------------------------------------------------------------------------------------------------------------------------------------------------------------------------------------------------------------------------------------------------------------------------------------------------------------------------------------------------------------------------------------------------------------------------------------------------------------------------|
| AtPH1-<br>LOV2 | GAAAGCGTTGATGATAAGGTCAGACAGAAGGAAATGAGAAAGGGAATCGATC<br>TCGCAACAACACTCGAAAGAATAGAAAAGAACTTTGTGATTACTGACCCTAGG<br>CTCCCCGATAATCCCATAATCTTCGCTTCAGACAGTTTCCTGGAGCTGACAGA<br>GTATAGCCGGGAAGAGATCCTGGGTAGAAATTGCAGATTCCTGCAGGGACCC<br>GAGACAGACCTGACCACCGTGAAGAAGATTCGCAATGCTATCGATAATCAAAC<br>CGAGGTTACCGTGCAACTGATAAACTACACTAAAAGCGGCAAGAAGTTCTGGA<br>ACATTTTCCACCTGCAGCCTATGCGGGACCAGAAGGGTGAGGTCCAATATTTT<br>ATCGGGGTGCAGCTGGATGGCAGCAAGCACGTTGAGCCCGTGCGG                                        |
| AtPH2-<br>LOV2 | GATTCTTGGGATCTGAGTGATAGGGAAAGGGATATTAGACAGGGAATAGACC<br>TCGCCACCACCCTGGAAAGAATTGAAAAGAATTTCTGTGATCAGCGACCCTAGA<br>CTGCCCGACAATCCAATCATTTTCGCCTCTGACTCTTTTCTGGAGCTGACCGA<br>ATACTCACGCGAAGAAATCCTGGGAAGGAACTGTAGGTTCTGCAAGGACCC<br>GAAACCGACCAGGCCACTGTCCAGAAGATTCGCGATGCCATCCGCGACCAGC<br>GGGAAATTACCGTTCAACTGATCAACTATACCAAATCTGGTAAGAAGTTTTGG<br>AACCTGTTCCACCTCCAGCCTATGCGGGACCAAAGGGCGAACTGCAATATTT<br>CATCGGGGTGCAGCTGGACGGGTCAGATCATGTGCGAGCCACTCCAG                                        |
| CrPH-<br>LOV1  | GCAGGACTCAGACATACATTTGTGGTGGCTGATGCAACACTCCCTGATTGCC<br>CACTGGTCTATGCAAGTGAGGGCTTCTACGCAATGACCGGATATGGACCTGA<br>CGAAGTGCTGGGTCACAACCTGTAGGTTTCTGCAGGGTGAGGGAACTGACCCC<br>AAGGAAGTGCAGAAAATTCGCGACGCCATCAAGAAGGGTGAGGCTTGTAGTG<br>TGCGCCTCCTGAACTATCGGAAGGACGGCACTCCCTTCTGGAACCTGCTGAC<br>AGTCACCCCAATTAACCCCTGATGGCCGCGTGTCCAAGTTTGTGCGCGTG<br>CAGGTGGATGTTACCTCCAAGACTGAAGGGAAAGCCCTGGCC                                                                                                         |
| NcVV-<br>LOV   | CACACTCTCTACGCCCAGGCGGGTACGATATTATGGGCTGGCTGATCCAGA<br>TCATGAACAGGCCCAATCCCCAGGTCGAGCTGGGACCCGTGGATACTTCATG<br>TGCACTGATACTGTGCGACCTGAAGCAGAAGGATACACCTATAGTTTACGCTT<br>CAGAAGCCTTTCTGTACATGACAGGGTATTCTAACGCCGAGGTGCTGGGGAG<br>GAACTGTAGGTTCTCCAGAGTCCCGATGGTATGGTGAAACCTAAGAGTACTC<br>GCAAATATGTGGATAGCAATACTATTAACACCATGAGGAAAGCCATCGACAGA<br>AACGCAGAAGTTCAGGTGGAAGTGGTGAACCTTAAGAAGAACGGCCAGCGGT<br>TCGTGAACTTTCTCACAATGATTCCAGTGCGGGACGAAACCGGGGAGTACCG<br>GTACAGCATGGGTTTTTCAGTGCGAAACCGAA |
| NcWC           | AAGAGCATCTATAGTAAGAGCGGATTCGACATGCTGAGAGCTCTGTGGTACG                                                                                                                                                                                                                                                                                                                                                                                                                                              |

|               |                                                                                                                                                                                                                                                                                                                                                                                                                                                                                                                                                                                           |
|---------------|-------------------------------------------------------------------------------------------------------------------------------------------------------------------------------------------------------------------------------------------------------------------------------------------------------------------------------------------------------------------------------------------------------------------------------------------------------------------------------------------------------------------------------------------------------------------------------------------|
| 1-LOV         | TGGCAAGTCGCAAAGATCCAAAGCTGAAGCTCGGAGCAGTGGATATGAGCTG<br>CGCCTTCGTGGTTTGGCAGCTGACCCTGAACGATTGCCCCATCATCTACGTC<br>AGCGACAATTTCCAGAATCTCACCGGATATTCTCGGCACGAAATCGTGGGAA<br>GAAACTGTAGATTTCTGCAGGCTCCCGACGGAAATGTTGAGGCTGGGACCAA<br>ACGCGAATTTGTGGAAAACAACGCAGTGTATACCCTGAAGAAAATATTGCTG<br>AGGGCCAGGAGATACAACAATCCCTCATTAACACAGAAAAGGTGGGAAACC<br>CTTCCTCAACCTCCTGACCATGATACCAATCCCTTGGGATACTGAAGAGATAA<br>GGTACTTTATCGGGTTTCAGATCGATCTCGTGGAAATGTCCCGACGCTATCATA<br>GGTCAGGAGGGCAATGGACCAATGCAAGTGAACATAACCCACAGT                                                                           |
| RsLP-<br>LOV  | GCCATGGATCAGAAGCAGTTTGAGAAGATTAGAGCTGTGTTTGACAGGTCAG<br>GGGTGCGACTGACCCTCGTTGACATGTCCCTGCCAGAGCAACCCCTGGTGCT<br>CGCCAACCCTCCATTTCTGAGAATGACTGGCTATACTGAGGGCCAGATCCTG<br>GGATTCAACTGCAGATTTCTCCAGAGAGGCGACGAAAATGCTCAGGCACGGG<br>CTGACATCAGAGATGCCCTCAAGCTCGGAAGGGAGCTCCAGGTGGTCCTCCG<br>CAATTACAGAGCCAACGATGAACCATTTGACAATCTGCTGTTCTGCACCCTG<br>TCGGTGGCAGACCCGACGCTCCTGACTACTTCTCGGTTCTCAGTTCGAGCT<br>GGGTAGAAGCGGAAATAGCGAAGAGGCAGCCGCAGCTGGACACGCAGGGG<br>CACTGACTGGGGAGCTCGCCAGAATAGGAACTGTGGCTGCTCGGCTCGAAAT<br>GGACAGTCGGAGACATCTGGCACAAGCTGCTGCAGCCCTGGTGAGGGCCTG<br>GGAAAGAAGGGGT |
| VfAU1-<br>LOV | CCTGACTACAGTCTCGTGAAGGCTCTGCAAATGGCACAACAGAATTTTGTGAT<br>TACAGACGCCTCCCTCCAGACAACCCTATCGTCTACGCCAGTAGAGGGTTT<br>CTGACACTGACAGGCTATTCTCTCGACCAGATCCTGGGCAGGAACTGCAGGT<br>TTCTGCAAGGGCCAGAAACAGACCCAAGAGCTGTGGATAAGATCAGGAATGC<br>CATACCAAAGGCGTTGATACCAGTGTCTGTCTGCTGAATTATAGACAGGATG<br>GCACAACCTTCTGGAATCTCTTCTTCGTGGCTGGACTCAGAGATTCTAAGGGC<br>AATATTGTCAACTACGTGCGAGTGCAGTCAAAGGTGAGCGAAGATTATGCCAA<br>GCTGCTGGTCAACGAGCAGAACATTGAGTACAAAGGTGTGCGCACCAGTAAC<br>ATGCTGCGCAGAAAG                                                                                                         |
| NgPA1<br>-LOV | CCAGATTATACACTCGTTAAAGCACTGCAAACCTGCTCAGCAGAATTTTGTGAT<br>CACCGACCCTACTCTGCCAGACAACCCATTGTCTATGCTTCAGGAGGATTTT<br>TCAGTCTCACAGGTTACCAGATGGATCAGATCCTGGGAAGAAATTGCAGATTT<br>CTGCAAGGACCTGATACTGACCCAGCTGCCGTGGACAAGATCAGAAGGGCTA<br>TCGAAGATGGTACAGACGGCAGTGTCTGTCTGCTGAACTACAGAGCAGATGG<br>ATCTACCTTTTGGAAATCAATTCTTCATTGCTGCTCTCAGAGGCGCTGACGGAA                                                                                                                                                                                                                                         |

|               |                                                                                                                                                                                                                                                                                                                                                                                                                                          |
|---------------|------------------------------------------------------------------------------------------------------------------------------------------------------------------------------------------------------------------------------------------------------------------------------------------------------------------------------------------------------------------------------------------------------------------------------------------|
|               | ATATCGTCAACTATGTCGGAGTGCAGTGTAAGTGTGAGAGGAGTATGCTTCA<br>GAAGTCCTCAAGAAGGAGGCTACTTCATCCACTGTGGCTGAAGCAAGTAGCA<br>AAAGA                                                                                                                                                                                                                                                                                                                    |
| OdPA1<br>-LOV | CCTGACTACAGTCTGGTTAAAGCACTCCAAACAGCACAGCAGAATTCGTTAT<br>CTCTGACCCTAGCATTCTGATAATCCCATTGTGTATGCTAGTCAGGGATTCT<br>GACTCACC GGATACGCACTGAGCGAGGTTCTCGGACGGAAGT GCCGGTTC<br>CTCCAAGGACCAGAAACAGACCCTAAAGCCGTCGAGAAAGTGAGAAAGGGTC<br>TGGAGAGAGGTGAAGATACCACCGTGGTGCTCCTGAATTATAGGAAAGATGG<br>AAGCACCTTCTGGAACCAACTGTTCATTGCTGCCCTGCGGGATGGTGAGGGC<br>AATGTGGTTAACTACCTCGGAGTTCAGTGCAAAGTCTCCGAGGACTACGCCAA<br>AGCCTTTCTGAAGAATGAAGAGAACGAGAAA |
