# Supplementary material
Source: PubMed Central journal article supplement (PMC4194103)
Supplement: embj0033-1713-sd17.pdf [file embj0033-1713-sd17.pdf]

**Table S5.** Protein sequences of mFGFR1 variants and light-activated RTKs.

| Name                                          | Sequence                                                                                                                                                                                                                                                                                                                                                                                                                                                                                                                                                                                                                                   |
|-----------------------------------------------|--------------------------------------------------------------------------------------------------------------------------------------------------------------------------------------------------------------------------------------------------------------------------------------------------------------------------------------------------------------------------------------------------------------------------------------------------------------------------------------------------------------------------------------------------------------------------------------------------------------------------------------------|
| imFGFR1                                       | MGSSKSKPKDPSQRLDMKSGTKKSDFHSMQMAVHKLAKSIPLRRQVTVSAD<br>SSASMNSGVLLVRPSRLSSSGTPMLAGVSEYELPEDPRWELPRDRLVLGK<br>PLGEGCFGQVVLAEIAGLDKDKPNRVTKVAVKMLKSDATEKDLSDLISEME<br>MMKMIGKHKNIINLLGACTQDGPLYVIVEYASKGNLREYLQARRPPGLEICY<br>NPSHNPEEQLSSKDLVSCAYQVARGMEYLASKKCIHRDLAARNVLVTEDNV<br>MKIADFGLARDIHHIDYYKKTNGRLPVKWMapeALFDRIYTHQSDVWSFG<br>VLLWEIFTLGGSPYPGVPVEELFKLLKEGHRMDKPSNCTNELYMMMRDCW<br>HAVPSQRPTFKQLVEDLDRIVALTSNQEYLDLSIPLDQYSPSFPDTRSSTCS<br>SGEDSVFSHEPLPEEPCLPRHPTQLANSGLKRRVETGKLEVEGVQVETISP<br>GDGRTPFKRGQTCVVHYTGMLEDGKKVDSSRDRNKPFKFMLGKQEVIRG<br>WEEGVAQMSVGQRAKLTISPDYAYGATGHPGIIPPHATLVFDVELLKLESG<br>GSGVDYPYDVPDYALD |
| imFGFR1-<br>ΔFKBP                             | MGSSKSKPKDPSQRLDMKSGTKKSDFHSMQMAVHKLAKSIPLRRQVTVSAD<br>SSASMNSGVLLVRPSRLSSSGTPMLAGVSEYELPEDPRWELPRDRLVLGK<br>PLGEGCFGQVVLAEIAGLDKDKPNRVTKVAVKMLKSDATEKDLSDLISEME<br>MMKMIGKHKNIINLLGACTQDGPLYVIVEYASKGNLREYLQARRPPGLEICY<br>NPSHNPEEQLSSKDLVSCAYQVARGMEYLASKKCIHRDLAARNVLVTEDNV<br>MKIADFGLARDIHHIDYYKKTNGRLPVKWMapeALFDRIYTHQSDVWSFG<br>VLLWEIFTLGGSPYPGVPVEELFKLLKEGHRMDKPSNCTNELYMMMRDCW<br>HAVPSQRPTFKQLVEDLDRIVALTSNQEYLDLSIPLDQYSPSFPDTRSSTCS<br>SGEDSVFSHEPLPEEPCLPRHPTQLANSGLKRRVETGGSGVDYPYDVPDY<br>ALD                                                                                                                           |
| mFGFR1-<br>VfAU1-LOV<br><br>(Opto-<br>mFGFR1) | MGSSKSKPKDPSQRLDMKSGTKKSDFHSMQMAVHKLAKSIPLRRQVTVSAD<br>SSASMNSGVLLVRPSRLSSSGTPMLAGVSEYELPEDPRWELPRDRLVLGK<br>PLGEGCFGQVVLAEIAGLDKDKPNRVTKVAVKMLKSDATEKDLSDLISEME<br>MMKMIGKHKNIINLLGACTQDGPLYVIVEYASKGNLREYLQARRPPGLEICY<br>NPSHNPEEQLSSKDLVSCAYQVARGMEYLASKKCIHRDLAARNVLVTEDNV<br>MKIADFGLARDIHHIDYYKKTNGRLPVKWMapeALFDRIYTHQSDVWSFG<br>VLLWEIFTLGGSPYPGVPVEELFKLLKEGHRMDKPSNCTNELYMMMRDCW<br>HAVPSQRPTFKQLVEDLDRIVALTSNQEYLDLSIPLDQYSPSFPDTRSSTCS<br>SGEDSVFSHEPLPEEPCLPRHPTQLANSGLKRRVETGPDYSLVKALQMAQ<br>QNFVITDASLPDNPVYASRGFLTLTGYSLDQILGRNCRFLQGPETDPRAVD<br>KIRNAITKGVDTSVCLLNRYRQDGTTFWNLFFVAGLRDSKGNIVNYVGVQSK                   |

|                                            |                                                                                                                                                                                                                                                                                                                                                                                                                                                                                                                                                                                                                                                                                                                                                                                                                                                                                                                                                                                                                                                                                                 |
|--------------------------------------------|-------------------------------------------------------------------------------------------------------------------------------------------------------------------------------------------------------------------------------------------------------------------------------------------------------------------------------------------------------------------------------------------------------------------------------------------------------------------------------------------------------------------------------------------------------------------------------------------------------------------------------------------------------------------------------------------------------------------------------------------------------------------------------------------------------------------------------------------------------------------------------------------------------------------------------------------------------------------------------------------------------------------------------------------------------------------------------------------------|
|                                            | VSEDYAKLLVNEQNIEYKGVRTSNMLRRKTGGSGVDYPYDVPDYALD                                                                                                                                                                                                                                                                                                                                                                                                                                                                                                                                                                                                                                                                                                                                                                                                                                                                                                                                                                                                                                                 |
| p75-hEGFR-<br>VfAU1-LOV<br><br>(Opto-EGFR) | MGAGATGRAMDGPRLLLLLLGVSLGGAKEACPTGLYTHSGECCKACNLG<br>EGVAQPCGANQTVCEPCLDSVTFSDVVSATEPCKPCTECVGLQSMSAPCV<br>EADDAVCRCAYGYQDETTGRCEACRVCEAGSGLVFSCQDKQNTVCEEC<br>PDGTYSDEANHVDPCLPCTVCEDTERQLRECTRWADAEECEIPGRWITRS<br>TPPEGSDSTAPSTQEPEAPPEQDLIASTVAGVTTVMGSSQPVVTRGTTDN<br>LIPVYCSILAAVVVGLVAYIAFKRGRARRRHIVRKRTLRRLLQERELVEPLTP<br>SGEAPNQALLRILKETEFKKIKVLGSGAFGTVYKGLWIPEGEKVKIPVAIKEL<br>REATSPKANKEILDEAYVMASVDNPHVCRLLGICLTSTVQLITQLMPFGCLL<br>DYVREHKDNIGSQYLLNWCVQIAKGMNYLEDRLVHRDLAARNVLVKTPO<br>HVKITDFGLAKLLGAEKEYHAEGGKVPKWMMALESILHRIYTHQSDVWSYG<br>VTWELMTFGSKPYDGIPASEISSILEKGERLPQPPICTIDVYMIMVKCWMID<br>ADSRPKFRELIIEFSKMARDPQRYLVIQGDERMHLPSPTDSNFYRALMDEE<br>DMDDVDADEYLIPQQGFFSSPSTSRTPLLSSLSATSNNSTVACIDRNLQ<br>SCPIKEDSFLQRYSSDPTGALTEDSIDDTFLPVPEYINQSVPKRPAGSVQNP<br>VYHNQPLNPAPSRDPHYQDPHSTAVGNPEYLNTVQPTCVNSTFDSPAHW<br>AQKGSHQISLDNPDYQQDFFPKEAKPNGIFKGSTAENAAYLRVAPQSSEFI<br>GASGGPDYSLVKALQMAQQNFVITDASLPDNPVIVYASRGFLTLTGYSLDQIL<br>GRNCRFLQGPETDPRAVDKIRNAITKGVDTSVCLLNRYRQDGTTFWNLFFVA<br>GLRDSKGNIVNYVGVQSKVSEDYAKLLVNEQNIEYKGVRTSNMLRRKPGG<br>SGVDYPYDVPDYALD |
| hRET-<br>VfAU1-LOV<br><br>(Opto-hRET)      | MGSSKSKPKDPSQRLDVTGHCYHKFAHKPPISSAEMTFRRPAQAFVPSYS<br>SSSARRPSLDSMENQVSVDAFKILEDPKWEFPRKNLVLGKTLGEGEFKVV<br>KATAFHLKGRAGYTTVAVKMLKENASPSELRDLLSEFNVLKQVNHPHVIKLY<br>GACSQDGPLLLIVEYAKYGSLRGFLRESRKVGPYLGSGGSRNSSSLDHP<br>DERALTMGDLISFAWQISQGMQYLAEMKLVHRDLAARNILVAEGRKMKISD<br>FGLSRDVYEEDSYVKRSQGRIPVKWMAIESLFDHIYTTQSDVWSFGVLLWE<br>IVTLGGNPYPGIPPERLFNLLKTGHRMERPDNCSEEMYRLMLQCWKQEPD<br>KRPVFADISKDLEKMMVKRRDYLDLAASTPSDSLIIYDDGLSEEETPLVDCNN<br>APLPRALPSTWIENKLYGRISHAFTRFTGGPDYSLVKALQMAQQNFVITDAS<br>LPDNPVIVYASRGFLTLTGYSLDQILGRNCRFLQGPETDPRAVDKIRNAITKGV<br>DTSVCLLNRYRQDGTTFWNLFFVAGLRDSKGNIVNYVGVQSKVSEDYAKLLV<br>NEQNIEYKGVRTSNMLRRKPGGSGVDYPYDVPDYALD                                                                                                                                                                                                                                                                                                                                                                                                                           |
